# Supplementary material
Source: PubMed Central journal article supplement (PMC5541218)
Supplement: AEM.00892-17_zam999117984s1.pdf [file AEM.00892-17_zam999117984s1.pdf]

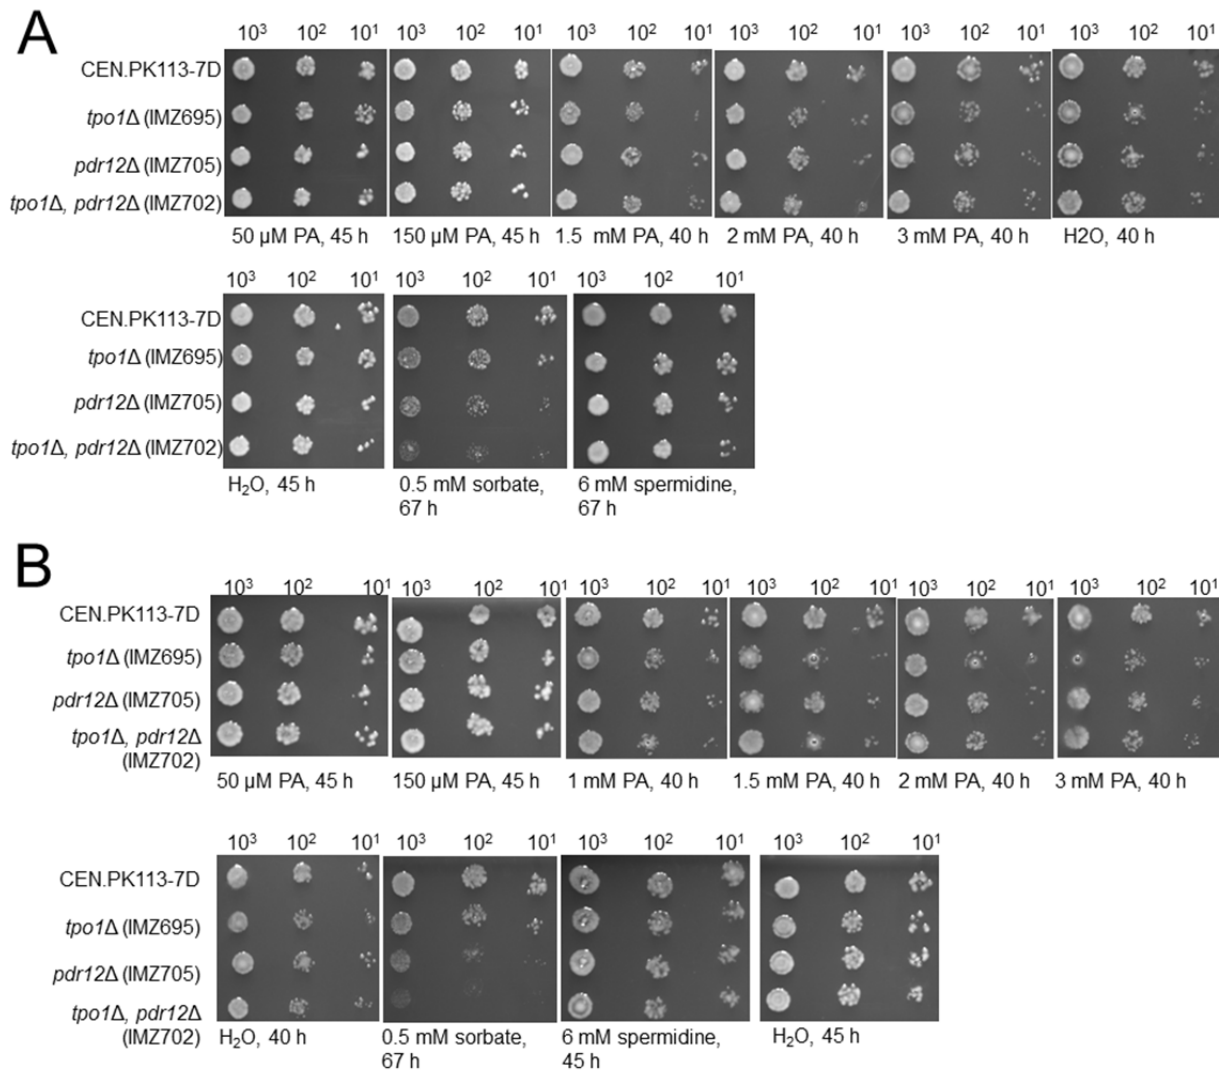

**FIG S1 Impact of *tpo1Δ* and *pdr12Δ* mutations on tolerance of *S. cerevisiae* to pimelic acid, sorbate, and spermidine** | *S. cerevisiae* strains were pregrown on liquid SMD and spotted on plates containing SMD (pH 4.5) **(A)** or in modified SMD (pH 4.5) in which the Mg<sup>2+</sup> concentration was reduced to 50 μM to facilitate polyamine uptake **(B)**. Plates were supplemented with 50 μM, 150 μM, 1 mM, 1.5 mM, 2 mM or 3 mM pimelic acid, 0.5 mM potassium sorbate, 6 mM spermidine or water (control) as indicated. Strains and relevant genotypes are indicated on the left-hand side, estimated numbers of plated cells are indicated on top and incubation times at 30°C are indicated below the photographs.

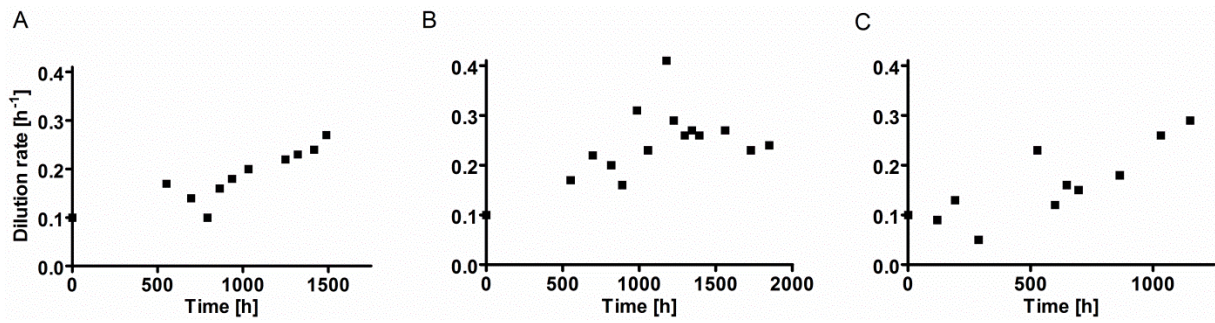

**FIG S2 Laboratory evolution of *S. cerevisiae* CEN.PK113-7D cells in accelerostat cultures for improved growth in biotin-free synthetic media | (A) IMS0478 (B) IMS0480 (C) IMS0481.**

Dilution rates were automatically feed-back controlled based on continuous analysis of the CO<sub>2</sub> output and the medium feed rate (see Methods). Dilution rates [h<sup>-1</sup>] are shown for three independent experiments.

**TABLE S1 Mutations in evolved biotin prototrophic *S. cerevisiae* strains** | Single nucleotide variants were called by comparison of whole-genome sequence data from the four strains evolved for biotin prototrophy with their parent strain CEN.PK113-7D. Listed are all nonsynonymous and nonsense mutations (\*). Descriptions of gene functions were obtained from the *Saccharomyces* Genome Database website ([www.yeastgenome.org](http://www.yeastgenome.org)).

| Gene                    | Amino acid change | Nucleotide change | Description                                                                                                                                                                                                                                       |
|-------------------------|-------------------|-------------------|---------------------------------------------------------------------------------------------------------------------------------------------------------------------------------------------------------------------------------------------------|
| IMS0478                 |                   |                   |                                                                                                                                                                                                                                                   |
| <i>ULS1</i>             | Asp-130-Val       | A389T             | Swi2/Snf2-related translocase required for maintenance of NHEJ inhibition at telomeres. Plays role in antagonizing silencing during mating-type switching.                                                                                        |
| <i>GPI11</i>            | Val-11-Gly        | T32G              | ER membrane protein involved in a late step of GPI anchor assembly. Involved in the addition of phosphoethanolamine to the multiply mannosylated glycosylphosphatidy-linositol (GPI) intermediate.                                                |
| <i>VIK1</i>             | Leu-577-Ile       | T1729A            | Protein that forms a kinesin-14 heterodimeric motor with Kar3p. Required for sister chromatid cohesion.                                                                                                                                           |
| <i>NMD2</i>             | Ser-567-*         | C1700A            | Protein involved in the nonsense-mediated mRNA decay (NMD) pathway. Involved in telomere maintenance.                                                                                                                                             |
| <i>THO2</i>             | Ser-53-*          | C158A             | Subunit of the THO complex. THO is required for efficient transcription elongation and involved in transcriptional elongation-associated recombination.                                                                                           |
| <i>HSE1</i>             | Val-222-Ile       | G664A             | Subunit of the endosomal Vps27p-Hse1p complex. Required for sorting of ubiquitinated membrane proteins, as well as for recycling of Golgi proteins and formation of luminal membranes.                                                            |
| IMS0480                 |                   |                   |                                                                                                                                                                                                                                                   |
| <i>MAK1</i><br><i>0</i> | Pro-42-Leu        | C125T             | Non-catalytic subunit of N-terminal acetyltransferase of the NatC type. Required for replication of dsRNA virus; expression is glucose-repressible.                                                                                               |
| <i>TPO1</i>             | Asp-262-Gly       | A785G             | Polyamine transporter of the major facilitator superfamily. Member of the 12-spanner drug-H(+) antiporter DHA1 family. Recognizes spermine, putrescine, and spermidine. Catalyzes uptake of polyamines at alkaline pH and excretion at acidic pH. |
| <i>ALD4</i>             | Gly-400-Ser       | G1198A            | Mitochondrial aldehyde dehydrogenase. Required for growth on ethanol and conversion of acetaldehyde to acetate.                                                                                                                                   |

|              |              |        |                                                                                                                                                                                                                                                                |
|--------------|--------------|--------|----------------------------------------------------------------------------------------------------------------------------------------------------------------------------------------------------------------------------------------------------------------|
| <i>BNI4</i>  | Ser-835-Pro  | T2503C | Targeting subunit for Glc7p protein phosphatase. Localized to the bud neck, required for localization of chitin synthase III to the bud neck via interaction with the chitin synthase III regulatory subunit Skt5p.                                            |
| <i>WAR1</i>  | Glu-456-*    | G1366T | Homodimeric Zn <sub>2</sub> Cys <sub>6</sub> zinc finger transcription factor. Binds to a weak acid response element to induce transcription of <i>PDR12</i> and <i>FUN34</i> , encoding an acid transporter and a putative ammonia transporter, respectively. |
| <i>CYR1</i>  | Glu-1879-Asp | A5673C | Adenylate cyclase. Required for cAMP production and cAMP-dependent protein kinase signalling.                                                                                                                                                                  |
| <i>BIO5</i>  | Ile-145-Thr  | T434C  | Putative transmembrane protein involved in the biotin biosynthesis. Responsible for uptake of 7-keto 8-aminopelargonic acid.                                                                                                                                   |
| IMS0481      |              |        |                                                                                                                                                                                                                                                                |
| <i>ASA1</i>  | Ile-436-Val  | A1306G | Subunit of the ASTRA complex, involved in chromatin remodelling. Telomere length regulator involved in the stability or biogenesis of PIKKs such as TORC1.                                                                                                     |
| <i>TPO1</i>  | Asp-133-Asn  | G397A  | Polyamine transporter of the major facilitator superfamily. Member of the 12-spanner drug-H(+) antiporter DHA1 family. Recognizes spermine, putrescine, and spermidine. Catalyses uptake of polyamines at alkaline pH and excretion at acidic pH.              |
| <i>VPS15</i> | Phe-452-Cys  | T1355G | Serine/threonine protein kinase involved in vacuolar protein sorting. Functions as a membrane-associated complex with Vps34p.                                                                                                                                  |
| <i>SPT21</i> | Glu-581-Lys  | G1741A | Protein with a role in transcriptional silencing. Required for normal transcription at several loci including HTA2-HTB2 and HHF2-HHT2, but not required at the other histone loci.                                                                             |
| <i>VHT1</i>  | Gly-288-Ala  | G863C  | High-affinity plasma membrane H <sup>+</sup> -biotin (vitamin H) symporter. Mutation results in fatty acid auxotrophy.                                                                                                                                         |
|              | Asn-174-Lys  | T522G  |                                                                                                                                                                                                                                                                |
| <i>BCY1</i>  | Val-262-Phe  | G784T  | Regulatory subunit of the cyclic AMP-dependent protein kinase (PKA). PKA is a component of a signalling pathway that controls a variety of cellular processes, including metabolism, cell cycle, stress response, stationary phase, and sporulation.           |
| <i>ALP1</i>  | Phe-422-Ser  | T1265C | Arginine transporter. Expression is normally very low and it is unclear what conditions would induce significant expression.                                                                                                                                   |
| <i>PDE1</i>  | Gly-41-Cys   | G121T  | Low-affinity cyclic AMP phosphodiesterase. Controls glucose and intracellular acidification-induced cAMP signalling, target of the cAMP-protein kinase A (PKA) pathway.                                                                                        |

|                   |             |        |                                                                                                                                                                                                                                                                     |
|-------------------|-------------|--------|---------------------------------------------------------------------------------------------------------------------------------------------------------------------------------------------------------------------------------------------------------------------|
| <i>PDR12</i>      | Trp-765-*   | G2295A | Plasma membrane ATP-binding cassette (ABC) transporter. Weak-acid-inducible multidrug transporter required for weak organic acid resistance. Induced by sorbate and benzoate and regulated by War1p.                                                                |
| <i>CIT2</i>       | Ala-289-Val | C866T  | Citrate synthase, peroxisomal isozyme involved in glyoxylate cycle. Catalyzes condensation of acetyl coenzyme A and oxaloacetate to form citrate.                                                                                                                   |
| <i>REC10</i><br>4 | Ser-76-Tyr  | C227A  | Protein involved in early stages of meiotic recombination. Required for meiotic crossing over.                                                                                                                                                                      |
| IMS0496           |             |        |                                                                                                                                                                                                                                                                     |
| <i>CSS3</i>       | Asp-117-Tyr | G349T  | Protein of unknown function, secreted when constitutively expressed. Deletion mutants are viable and have elevated levels of Ty1 retrotransposition and Ty1 cDNA.                                                                                                   |
| <i>TPO1</i>       | Trp-302-*   | G905A  | Polyamine transporter of the major facilitator superfamily. Member of the 12-spanner drug-H(+) antiporter DHA1 family. Recognizes spermine, putrescine, and spermidine. Catalyzes uptake of polyamines at alkaline pH and excretion at acidic pH.                   |
| <i>TDA6</i>       | Pro-38-Arg  | C113G  | Putative protein of unknown function.                                                                                                                                                                                                                               |
| <i>NCA3</i>       | Ala-289-Gly | C866G  | Protein involved in mitochondrion organization.                                                                                                                                                                                                                     |
| <i>RPN1</i>       | Lys-943-*   | A2827T | Non-ATPase base subunit of the 19S RP of the 26S proteasome.                                                                                                                                                                                                        |
| <i>FCJ1</i>       | Glu-234-Asp | A702C  | Component of the MICOS complex. MICOS is a mitochondrial inner membrane complex that extends into the intermembrane space and has a role in the maintenance of crista junctions, inner membrane architecture, and formation of contact sites to the outer membrane. |

---

**TABLE S2 mRNA levels of *BIO* genes in strains evolved for biotin prototrophy grown in the presence (+) or absence (-) of biotin prior to mRNA extraction** | (+) Relative expression levels of *BIO1*, *BIO2*, *BIO3*, *BIO4*, and *BIO6* measured in the parent strain CEN.PK113-7D and the evolved strains IMS0478, IMS0480, IMS0481, and IMS0496 upon growth in the presence of biotin supplementation. (-) Relative expression levels of *BIO1*, *BIO2*, *BIO3*, *BIO4*, and *BIO6* measured in the evolved strains IMS0478, IMS0480, IMS0481, and IMS0496 upon growth in the absence of biotin supplementation. The parent strain was unable to grow in absence of biotin. All qPCR experiments were carried out on duplicate cultures, with analytical triplicates for each culture. Relative expression levels were determined according to the  $\Delta\Delta CT$  method (1) and indicated with the standard error of the mean (SEM) of duplicate analyses. A graphical representation of the data can be found in Fig. 3.

|             | <b>Biotin</b> | <b>IMS0478</b> | <b>IMS0480</b> | <b>IMS0481</b> | <b>IMS0496</b> | <b>CEN.PK113-7D</b> |
|-------------|---------------|----------------|----------------|----------------|----------------|---------------------|
| <i>BIO1</i> | +             | 0.8 ± 0.0      | 0.4 ± 0.1      | 0.4 ± 0.0      | 0.8 ± 0.1      | 0.1 ± 0.0           |
|             | -             | 16.2 ± 2.3     | 1.8 ± 0.7      | 2.7 ± 0.1      | 24.4 ± 0.3     | -                   |
| <i>BIO2</i> | +             | 0.1 ± 0.0      | 0.0 ± 0.0      | 0.0 ± 0.0      | 0.3 ± 0.0      | 0.1 ± 0.0           |
|             | -             | 2.2 ± 0.3      | 0.2 ± 0.1      | 0.6 ± 0.1      | 5.0 ± 0.5      | -                   |
| <i>BIO3</i> | +             | 0.2 ± 0.0      | 0.0 ± 0.0      | 0.0 ± 0.0      | 0.0 ± 0.0      | 0.0 ± 0.0           |
|             | -             | 6.4 ± 0.7      | 0.0 ± 0.0      | 0.1 ± 0.0      | 1.1 ± 0.0      | -                   |
| <i>BIO4</i> | +             | 0.2 ± 0.0      | 0.0 ± 0.0      | 0.1 ± 0.0      | 0.1 ± 0.0      | 0.1 ± 0.0           |
|             | -             | 4.8 ± 0.7      | 0.0 ± 0.0      | 0.6 ± 0.1      | 1.7 ± 0.1      | -                   |
| <i>BIO6</i> | +             | 0.2 ± 0.0      | 0.0 ± 0.0      | 0.0 ± 0.0      | 0.2 ± 0.0      | 0.0 ± 0.0           |
|             | -             | 5.2 ± 0.8      | 0.1 ± 0.0      | 0.6 ± 0.0      | 4.1 ± 0.0      | -                   |

1. **Schmittgen TD, Livak KJ.** 2008. Analyzing real-time PCR data by the comparative CT method. *Nat Protoc* **3**:1101-1108.
